# Supplementary material for: Constitutive signal bias mediated by the human GHRHR splice variant 1
Source: PubMed Central journal article supplement (PMC8501799; doi:10.1073/pnas.2106606118), 2021-10-01
Supplement: pnas.2106606118.sapp.pdf [file pnas.2106606118.sapp.pdf]

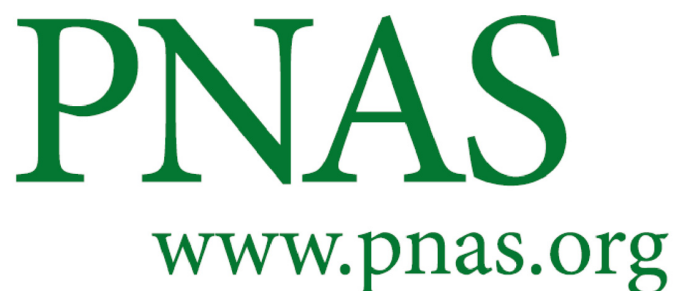

## Supporting Information for

### Constitutive signal bias mediated by the human GHRHR splice variant 1

Zhaotong Cong<sup>1,2,11</sup>, Fulai Zhou<sup>3,11</sup>, Chao Zhang<sup>4,5,11</sup>, Xinyu Zou<sup>6,11</sup>, Huibing Zhang<sup>7</sup>, Yuzhe Wang<sup>5,8</sup>, Qingtong Zhou<sup>1</sup>, Xiaoqing Cai<sup>3,8</sup>, Qiaofeng Liu<sup>2</sup>, Jie Li<sup>1</sup>, Lijun Shao<sup>4,5</sup>, Chunyou Mao<sup>7</sup>, Xi Wang<sup>5,8</sup>, Jihong Wu<sup>9</sup>, Tian Xia<sup>6</sup>, Lihua Zhao<sup>3</sup>, Hualiang Jiang<sup>10</sup>, Yan Zhang<sup>7</sup>, H. Eric Xu<sup>3,\*</sup>, Xi Cheng<sup>10,\*</sup>, Dehua Yang<sup>3,5,8,\*</sup>, Ming-Wei Wang<sup>1,2,3,4,5,8,\*</sup>

<sup>1</sup>Department of Pharmacology, School of Basic Medical Sciences, Fudan University, Shanghai 200032, China; <sup>2</sup>School of Pharmacy, Fudan University, Shanghai 201203, China; <sup>3</sup>The CAS Key Laboratory of Receptor Research, Shanghai Institute of Materia Medica, Chinese Academy of Sciences, Shanghai 201203, China; <sup>4</sup>School of Life Science and Technology, ShanghaiTech University, Shanghai 201210, China; <sup>5</sup>University of Chinese Academy of Sciences, Beijing 100049, China; <sup>6</sup>School of Artificial Intelligence and Automation, Huazhong University of Science and Technology, Wuhan 430074, China; <sup>7</sup>Department of Biophysics and Department of Pathology of Sir Run Run Shaw Hospital, Zhejiang University School of Medicine, Hangzhou 310058, China; <sup>8</sup>The National Center for Drug Screening, Shanghai Institute of Materia Medica, Chinese Academy of Sciences, Shanghai 201203, China; <sup>9</sup>Eye and ENT Hospital, Fudan University, Shanghai 200031, China; <sup>10</sup>State Key Laboratory of Drug Research and Drug Discovery and Design Center, Shanghai Institute of Materia Medica, Chinese Academy of Sciences, 201203, Shanghai, China; <sup>11</sup>These authors contributed equally to this work.

\***Correspondence:** H. Eric Xu, Xi Cheng, Dehua Yang, Ming-Wei Wang

**Email:** [eric.xu@simmm.ac.cn](mailto:eric.xu@simmm.ac.cn), [xicheng@simmm.ac.cn](mailto:xicheng@simmm.ac.cn), [dhyang@simmm.ac.cn](mailto:dhyang@simmm.ac.cn), [mwwang@simmm.ac.cn](mailto:mwwang@simmm.ac.cn)

#### This PDF file includes:

Figures S1 to S9  
Tables S1 to S4

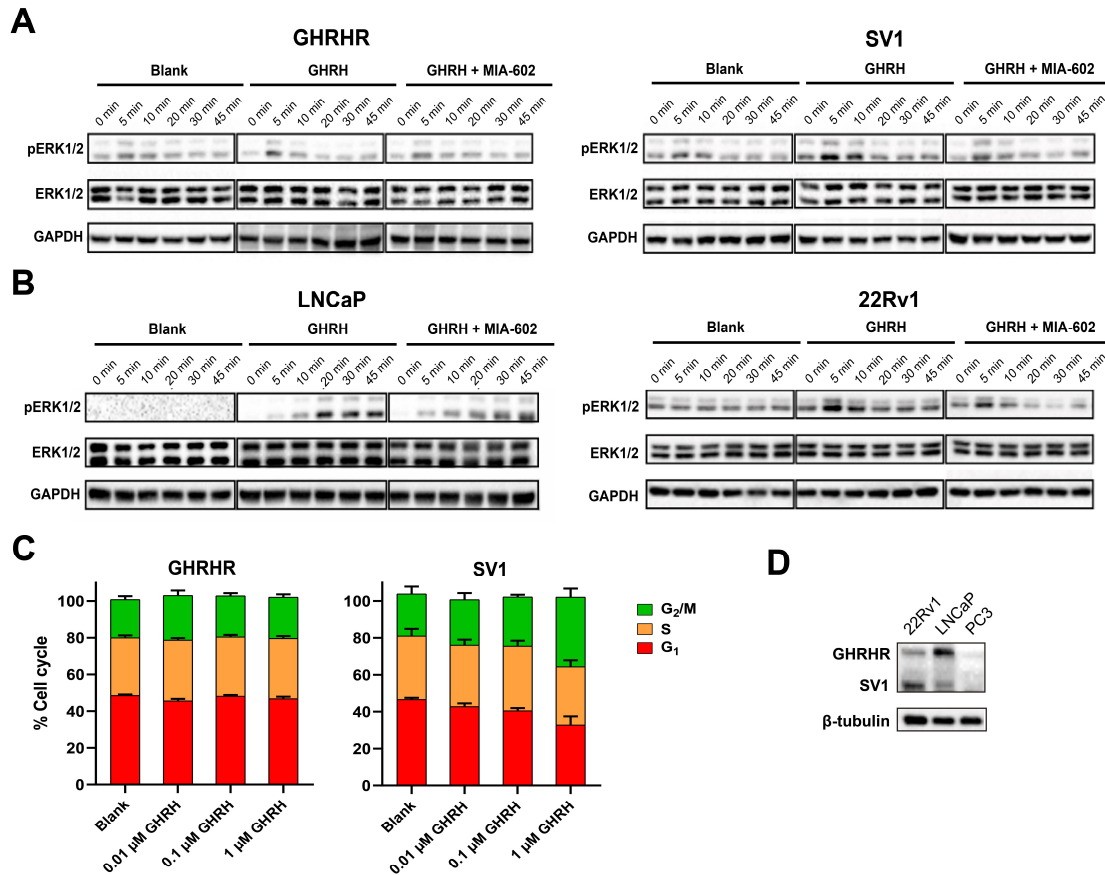

**Figure S1. GHRH-induced pERK1/2 signaling mediated by SV1 and GHRHR and concurrent cell cycle change.** (A, B) Representative time-course signaling of ERK1/2 monitored by immunoblotting of the total ERK1/2 and phosphorylated ERK1/2 (pERK1/2). The assay was initiated by 1 μM GHRH and inhibition was achieved by 4 μM MIA-602 in HEK293T cells expressing GHRHR or SV1 (A) and prostate cancer cell lines (B). (C) Cell distribution in G<sub>1</sub>, S and G<sub>2</sub>/M phases after treatment of different concentrations of GHRH. Data shown are means ± S.E.M. of at least three independent experiments ( $n = 3-5$ ) performed in duplicate. (D) Expression of GHRHR and SV1 in prostate cancer cell lines.

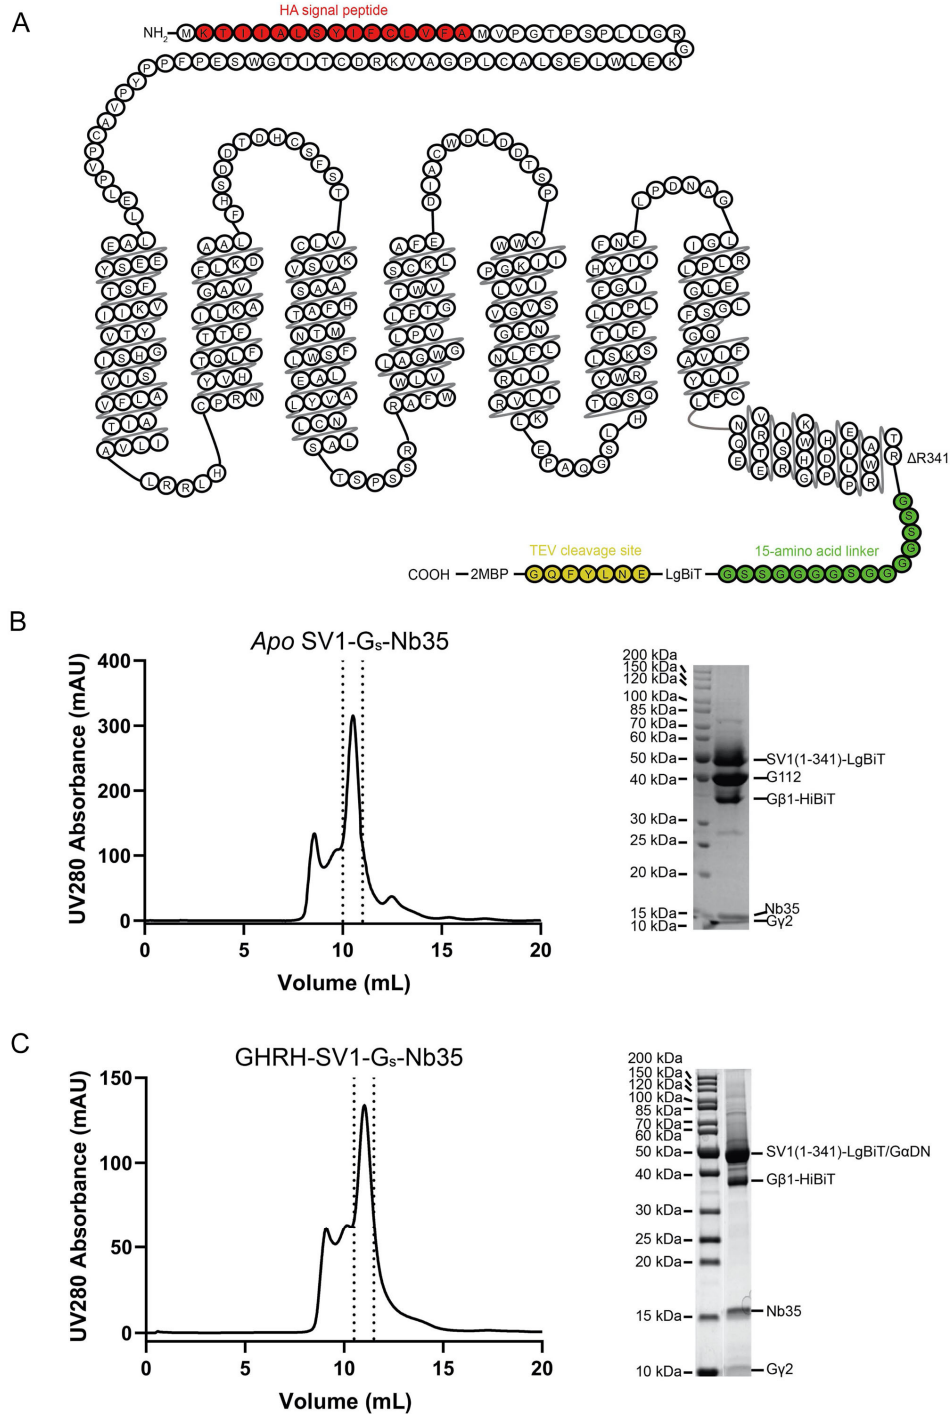

**Figure S2. Purification and characterization of the SV1-G<sub>s</sub>-Nb35 complex.** (A) Schematic of the HA-SV1(1-341)-15AA-LgBiT-TEV-2MBP construct used in cryo-EM study. The HA signal peptide (red), 15-amino acid (AA) linker (green), Tev cleavage site (yellow) and R341 truncation site are highlighted and indicated. (B, C) Size-exclusion chromatography elution profile and corresponding SDS-PAGE gel of the apo SV1-G<sub>s</sub>-Nb35 (B) and GHRH-SV1-G<sub>s</sub>-Nb35 (C) complexes. G112 is an engineered Gα<sub>s</sub> protein.

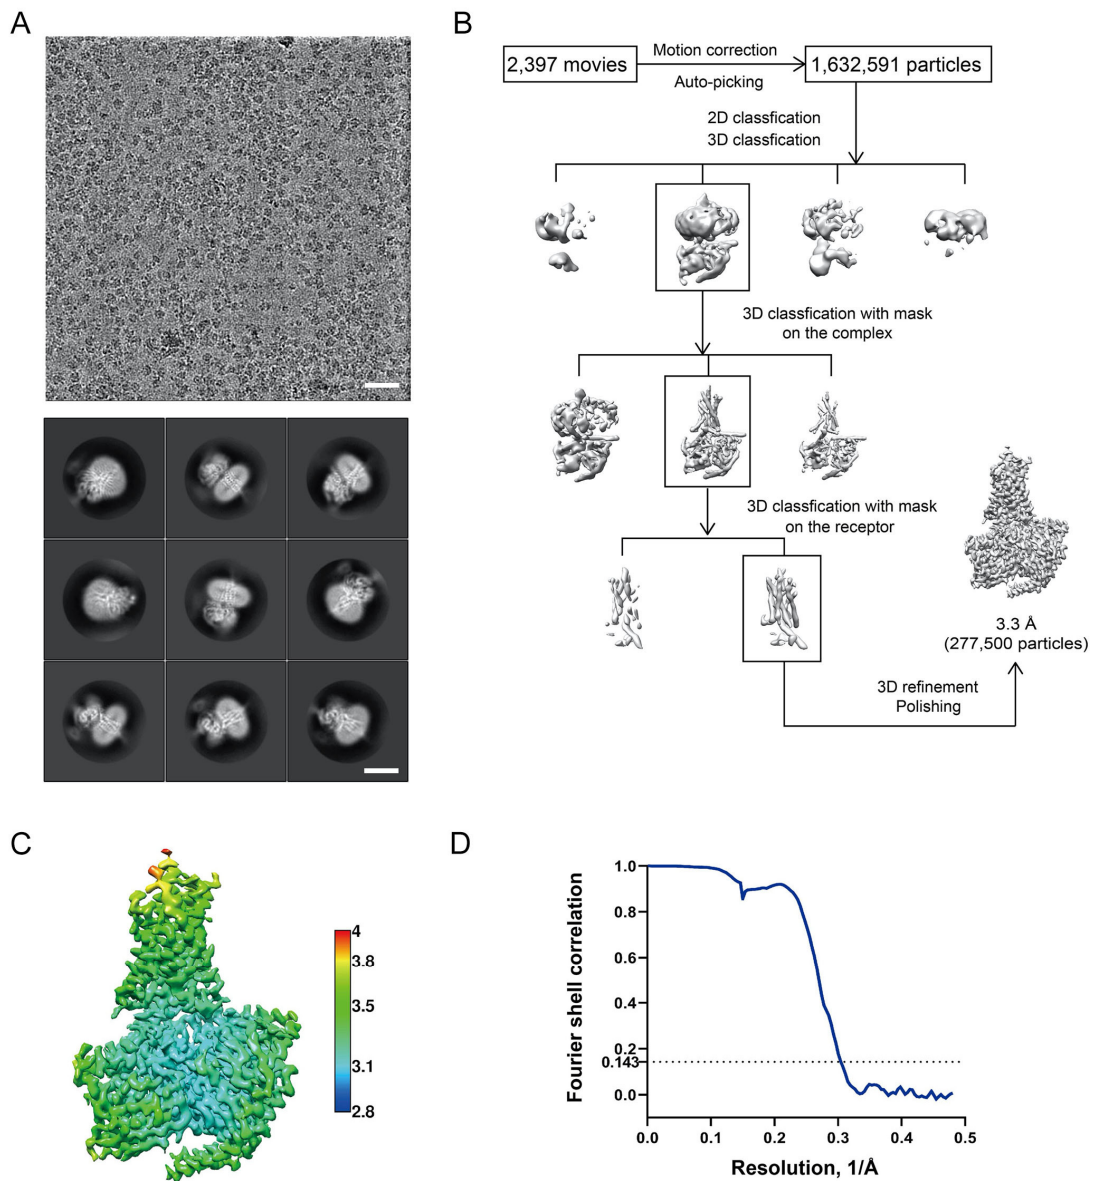

**Figure S3. Cryo-EM data processing and validation of the GHRH-SV1-G<sub>s</sub>-Nb35 complex.** (A) Representative cryo-EM micrograph (scale bar: 40 nm) and two-dimensional class averages (scale bar: 5 nm). (B) Flow chart of cryo-EM data processing. (C) Local resolution distribution map of the complex. (D) Fourier shell correlation (FSC) curve of the overall refined receptor.

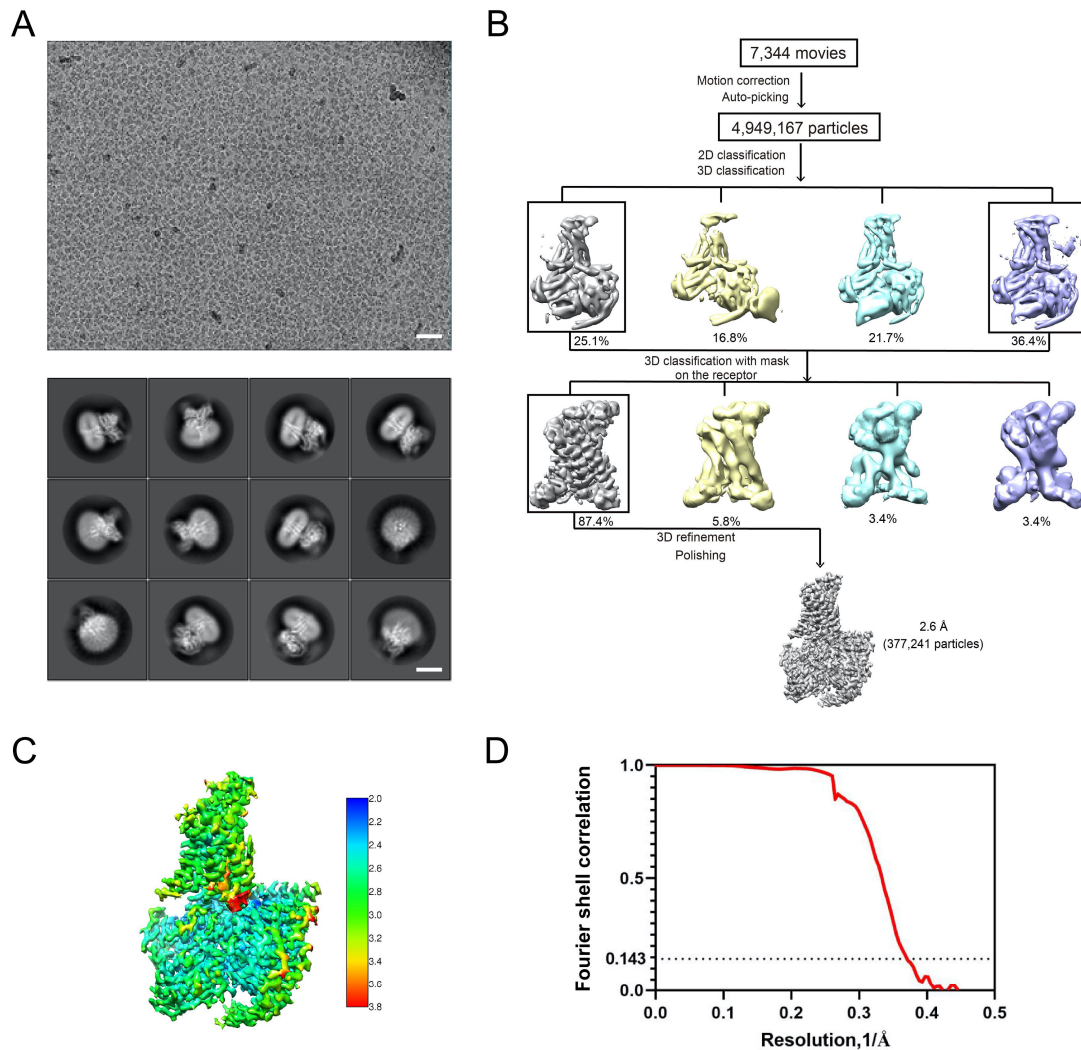

**Figure S4. Cryo-EM data processing and validation of the *apo* SV1-G<sub>s</sub>-Nb35 complex.** (A) Representative cryo-EM micrograph (scale bar: 40 nm) and two-dimensional class averages (scale bar: 5 nm). (B) Flow chart of cryo-EM data processing. (C) Local resolution distribution map of the complex. (D) FSC curves of the overall refined receptor.

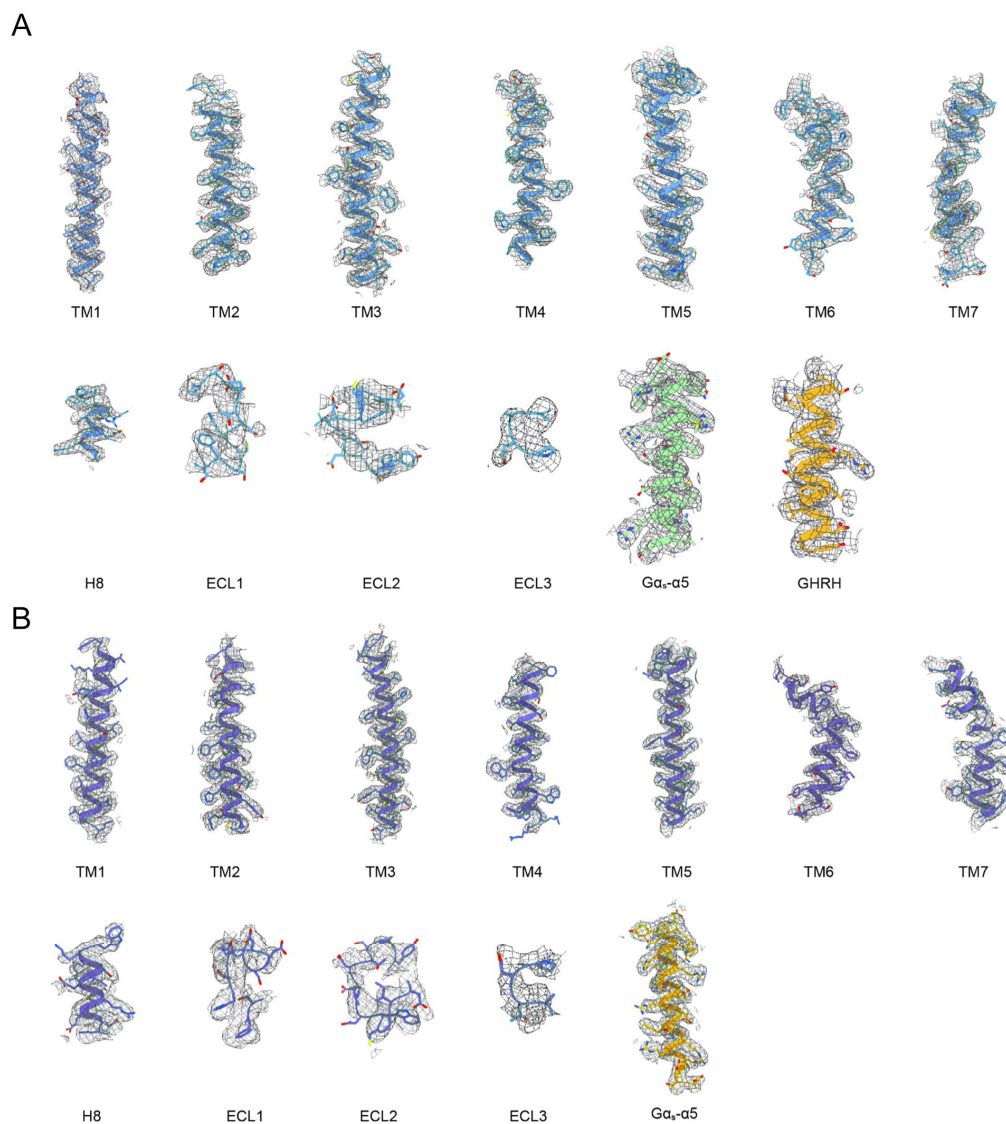

**Figure S5. Cryo-EM density map of the GHRH-SV1-G<sub>s</sub> and the *apo* SV1-G<sub>s</sub> structures.** (A) Cryo-EM density map and model of the GHRH-SV1-G<sub>s</sub> structure are shown for all seven-transmembrane (TM)  $\alpha$ -helices, ECLs 1-3, helix 8 (H8) of SV1, GHRH, G $\alpha$  and helix  $\alpha$ 5. (B) Cryo-EM density map and model of the *apo* SV1-G<sub>s</sub> structure are shown for all 7-TM  $\alpha$ -helices, ECLs 1-3, helix 8 of SV1, G $\alpha$  and helix  $\alpha$ 5.

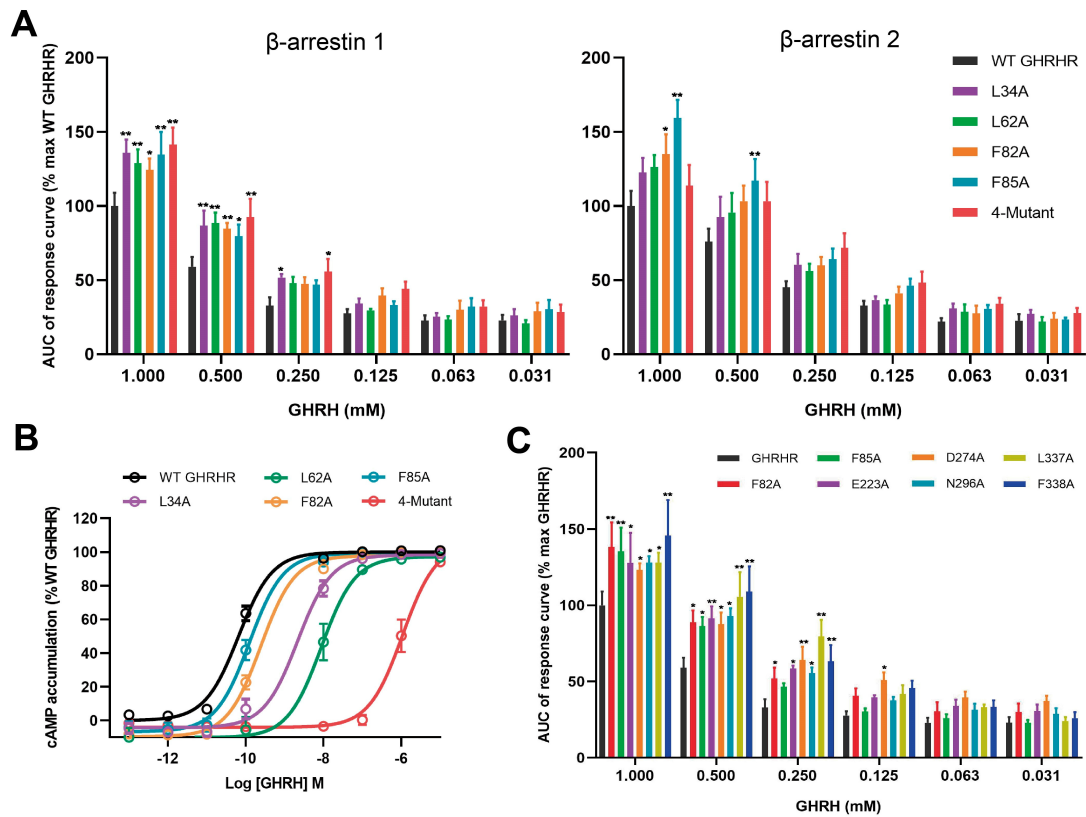

**Figure S6. Residues of GHRHR responsible for biased signaling.** (A) Mutations in the extracellular domain (ECD) reduced the cAMP response of GHRHR. (B) Mutations in the ECD affect  $\beta$ -arrestin 1/2 recruitment by GHRHR. 4-Mutant, single-point GHRHR mutation made simultaneously at 4 residues, L34A, L62A, F82A and F85A. (C)  $\beta$ -arrestin 1 recruitment by GHRHR and its mutants. Data shown are means  $\pm$  S.E.M. of five independent experiments ( $n = 5$ ) performed in quadruplicate or duplicate, respectively; \* $P < 0.05$ , \*\* $P < 0.01$ . WT, wild-type; max, maximum.

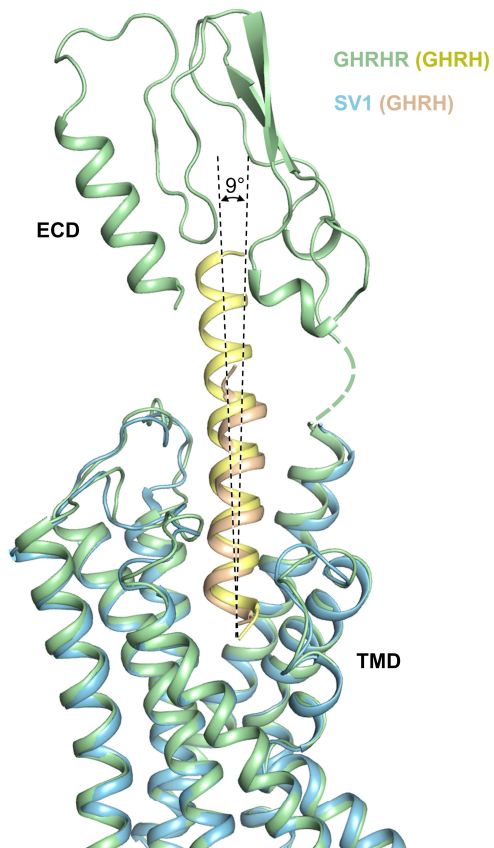

**Figure S7. Comparison between the cryo-EM structures of GHRH-SV1-G<sub>s</sub> and GHRH-GHRHR-G<sub>s</sub> complexes at the extracellular side.** Receptors and GHRH are shown in cartoon: GHRHR is colored in green, SV1 in blue, GHRH in wheat and yellow. G<sub>s</sub> is omitted for clarity. ECD, extracellular domain; TMD, transmembrane domain.



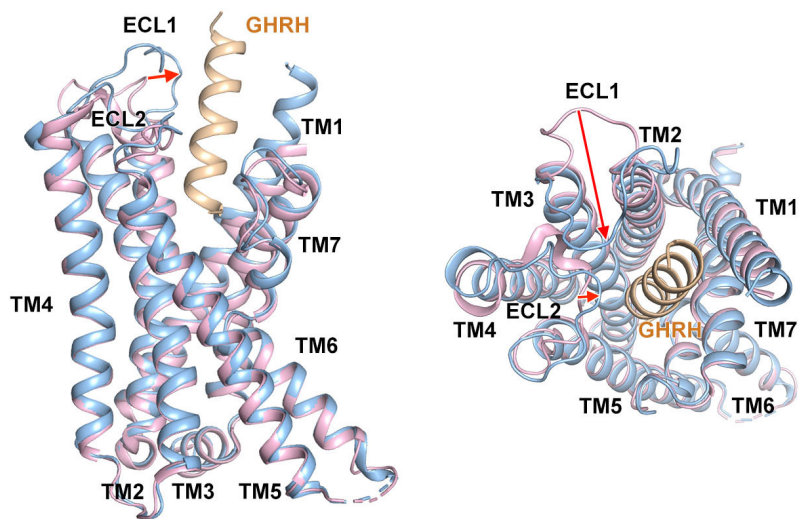

**Figure S8. Comparison of the GHRH-SV1-G<sub>s</sub> complex structure with that of the apo SV1-G<sub>s</sub> complex.** Both side (left) and top (right) views are displayed. Receptors and GHRH are shown in cartoon. In the GHRH-SV1-G<sub>s</sub> complex structure, SV1 is colored in blue and GHRH is in wheat. In the apo SV1-G<sub>s</sub> complex structure, SV1 is colored in pink. G<sub>s</sub> is omitted for clarity.

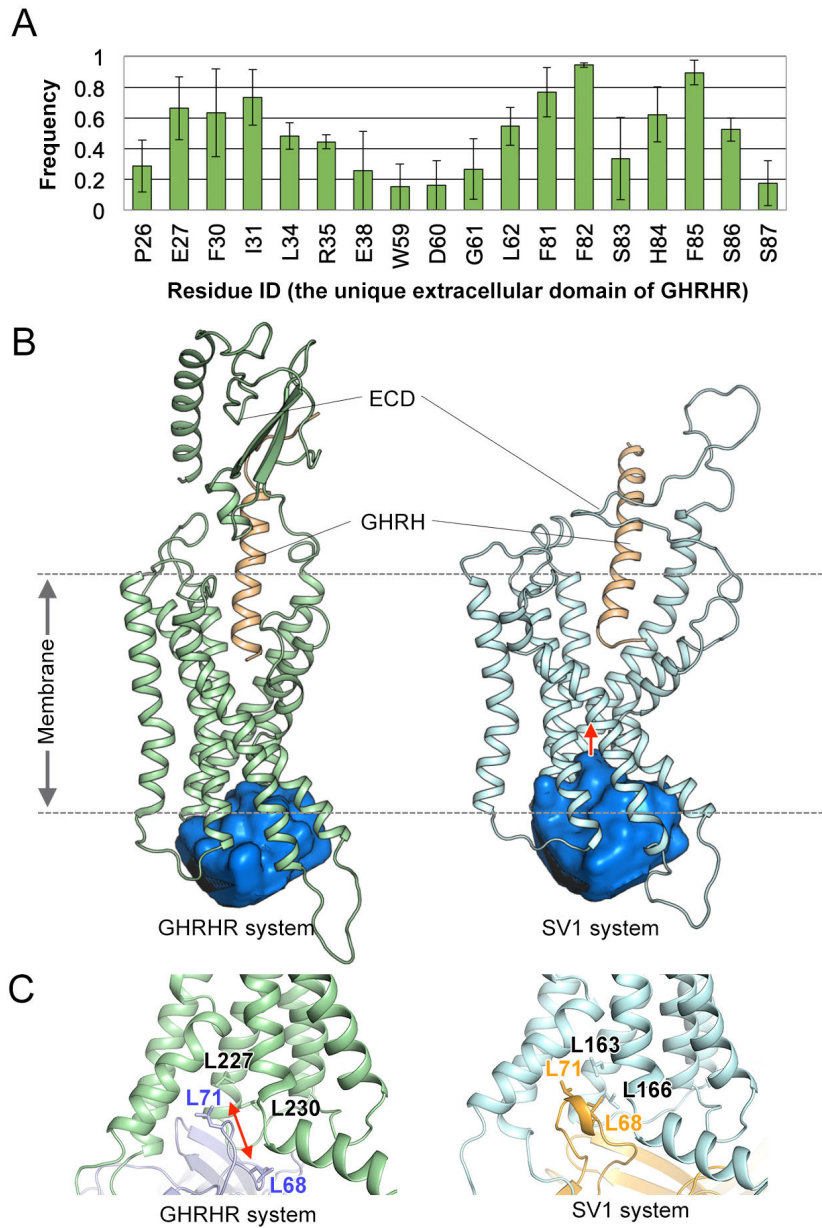

**Figure S9. Extracellular and intracellular interactions of GHRHR and SV1.** (A) Interacting frequency between an ECD residue of GHRHR and GHRH. The interacting frequency value indicates the stability of a particular residue-peptide interaction. A large interacting frequency implies a stable interaction. (B) Representative simulation snapshots from GHRHR system (left) and SV1 system (right). Receptors and GHRH are shown in cartoon: GHRHR is colored in green, SV1 in blue, GHRH in wheat.  $\beta$ -arrestin 1 is omitted for clarity. Arrestin-binding pockets are shown in surface depict. (C) A representative simulation snapshot showing key interactions of GHRHR (green) and SV1 (blue) at intracellular side. Key residues are shown as sticks.

**Table S1.** Effects of SV1 on GHRH-induced G<sub>s</sub> activation.

| Plasmid               | pEC <sub>50</sub> | E <sub>max</sub> (% WT GHRHR) |
|-----------------------|-------------------|-------------------------------|
| GHRHR/G <sub>s</sub>  | 8.17 ± 0.17       | 84.99 ± 3.32                  |
| SV1/G <sub>s</sub>    | 5.63 ± 0.36*      | 56.67 ± 13.79*                |
| Vector/G <sub>s</sub> | NA                | NA                            |

G protein NanoBiT data were analyzed using a three-parameter logistic equation to determine pEC<sub>50</sub> and E<sub>max</sub> values. pEC<sub>50</sub> is the negative logarithm of the molar concentration of agonist that induced half the maximal response. E<sub>max</sub> is expressed as a percentage of GHRHR/G<sub>s</sub> response. All values are means ± S.E.M. of five independent experiments (*n* = 5) conducted in duplicate. One-way ANOVA was used to determine statistical significance (\**P* < 0.05). WT, wild-type; NA, not active.

**Table S2.** Effects of residue mutation or truncation in the ECD of GHRHR on GHRH-induced cAMP accumulation.

| Mutant                  | pEC <sub>50</sub> | E <sub>max</sub><br>(% WT GHRHR) | Cell surface<br>expression<br>(% WT GHRHR) | ΔLog (τ/K <sub>A</sub> ) |
|-------------------------|-------------------|----------------------------------|--------------------------------------------|--------------------------|
| WT GHRHR                | 10.38 ± 0.07      | 100.50 ± 1.81                    | 100                                        | 0 ± 0.05                 |
| SV1                     | 6.43 ± 0.06***    | 104.85 ± 2.20                    | 31.37 ± 6.83                               | -2.98 ± 0.04***          |
| GHRHR Δ89               | 6.27 ± 0.06***    | 106.29 ± 2.48                    | 49.46 ± 8.69                               | -3.28 ± 0.03***          |
| GHRHR ΔECD              | 5.53 ± 0.07***    | 111.27 ± 3.65                    | 209.26 ± 5.61                              | -4.55 ± 0.04***          |
| GHRHR Δ32               | 6.55 ± 0.05***    | 105.06 ± 1.93                    | 79.27 ± 3.78                               | -3.23 ± 0.04***          |
| GHRHR Δ42               | 6.95 ± 0.04***    | 104.23 ± 1.53                    | 91.80 ± 4.81                               | -2.86 ± 0.02***          |
| GHRHR Δ52               | 6.62 ± 0.04***    | 105.63 ± 1.62                    | 40.54 ± 5.0                                | -2.83 ± 0.03***          |
| GHRHR Δ62               | 6.34 ± 0.05***    | 103.91 ± 2.19                    | 31.30 ± 6.55                               | -3.05 ± 0.03***          |
| GHRHR Δ72               | 6.44 ± 0.06***    | 104.35 ± 2.57                    | 35.73 ± 7.58                               | -2.98 ± 0.04***          |
| GHRHR Δ82               | 6.23 ± 0.06***    | 104.32 ± 2.51                    | 31.60 ± 5.79                               | -3.14 ± 0.03***          |
| GHRHR Δ92               | 6.25 ± 0.06***    | 105.98 ± 2.38                    | 45.34 ± 5.32                               | -3.78 ± 0.03***          |
| GHRHR Δ102              | 6.09 ± 0.05***    | 107.29 ± 2.15                    | 121.17 ± 12.35                             | -3.55 ± 0.02***          |
| GHRHR Δ112              | 5.93 ± 0.05***    | 106.27 ± 2.34                    | 54.92 ± 7.98                               | -3.65 ± 0.02***          |
| L34A                    | 8.67 ± 0.11***    | 100.70 ± 2.23                    | 94.27 ± 12.02                              | -0.78 ± 0.06***          |
| L62A                    | 8.06 ± 0.10***    | 97.99 ± 2.00                     | 62.40 ± 5.34                               | -1.03 ± 0.04***          |
| F82A                    | 9.61 ± 0.49***    | 99.77 ± 1.36                     | 102.74 ± 12.13                             | -0.53 ± 0.05***          |
| F85A                    | 9.91 ± 0.06**     | 100.24 ± 1.69                    | 96.75 ± 10.38                              | -0.27 ± 0.04***          |
| L34A-L62A-<br>F82A-F85A | 5.97 ± 0.09***    | 105.23 ± 5.52                    | 77.50 ± 6.89                               | -4.07 ± 0.04***          |

cAMP accumulation data were analyzed using a three-parameter logistic equation to determine pEC<sub>50</sub> and E<sub>max</sub> values. pEC<sub>50</sub> is the negative logarithm of the molar concentration of agonist that induced half the maximal response. E<sub>max</sub> for mutants is expressed as a percentage of the WT GHRHR. Data were analyzed by nonlinear regression using the operational model equation to determine the logR values (logτ/K<sub>A</sub>, *i.e.*, logarithm of the transduction ratio). τ is the efficacy value of the agonist and was corrected by cell surface expression of the receptor. K<sub>A</sub> is dissociation constant. Changes in transduction ratio (ΔlogR) were calculated to determine the relative effectiveness of the mutants. All values are means ± S.E.M. of at least three independent experiments (*n* = 3-5) conducted in quadruplicate. Statistical analysis was carried out by comparing the control responses in the WT GHRHR. \*\*, *P* < 0.01 and \*\*\*, *P* < 0.001, determined by one-way ANOVA.

**Table S3.** Cryo-EM data collection, model refinement and validation statistics.

| <b>Data collection and processing</b>               | <b>GHRH-SV1-G<sub>s</sub>-Nb35</b> | <b>SV1-G<sub>s</sub>-Nb35</b> |
|-----------------------------------------------------|------------------------------------|-------------------------------|
| Magnification                                       | 130,000                            | 130,000                       |
| Voltage (kV)                                        | 300                                | 300                           |
| Electron exposure (e <sup>-</sup> /Å <sup>2</sup> ) | 80                                 | 73                            |
| Defocus range (μm)                                  | -1.2 to -2.2                       | -1.5 to -2.5                  |
| Pixel size (Å)                                      | 1.04                               | 1.045                         |
| Symmetry imposed                                    | C1                                 | C1                            |
| Initial particle images (no.)                       | 1,632,591                          | 4,949,167                     |
| Final particle images (no.)                         | 277,500                            | 377,241                       |
| Map resolution (Å)                                  | 3.29                               | 2.60                          |
| FSC threshold                                       | 0.143                              | 0.143                         |
| Map resolution range (Å)                            | 2.9-4.6                            | 2.2-4.0                       |
| <b>Refinement</b>                                   |                                    |                               |
| Initial model used (PDB code)                       | 7CZ5                               | 7CZ5                          |
| Model resolution (Å)                                | 3.4                                | 3.1                           |
| FSC threshold                                       | 0.5                                | 0.5                           |
| Map sharpening B factor (Å <sup>2</sup> )           | -104.32                            | -82.56                        |
| Model composition                                   |                                    |                               |
| Non-hydrogen atoms                                  | 8,139                              | 8,047                         |
| Protein residues                                    | 1,029                              | 1,019                         |
| B factors (Å <sup>2</sup> )                         |                                    |                               |
| Protein                                             | 57.85                              | 93.64                         |
| Root mean square deviation                          |                                    |                               |
| Bond lengths (Å)                                    | 0.004                              | 0.004                         |
| Bond angles (°)                                     | 0.643                              | 0.679                         |
| Validation                                          |                                    |                               |
| MolProbity score                                    | 1.52                               | 1.39                          |
| Clash score                                         | 4.39                               | 3.50                          |
| Poor rotamers (%)                                   | 0.23                               | 0.00                          |
| Ramachandran plot                                   |                                    |                               |
| Favored (%)                                         | 95.63                              | 96.31                         |
| Allowed (%)                                         | 4.37                               | 3.69                          |
| Disallowed (%)                                      | 0.00                               | 0.00                          |

**Table S4.** Effects of residue mutation in the ligand-binding pocket of SV1 on GHRH-induced cAMP accumulation.

| Mutant | pEC <sub>50</sub> | E <sub>max</sub><br>(% WT GHRHR) | Cell surface expression<br>(% WT GHRHR) | ΔLog (τ/K <sub>A</sub> ) |
|--------|-------------------|----------------------------------|-----------------------------------------|--------------------------|
| GHRHR  | 10.83 ± 0.04      | 100                              | 100                                     | 0.00 ± 0.09              |
| SV1    | 6.38 ± 0.06       | 101.74 ± 2.28                    | 47.56 ± 3.76                            | -3.93 ± 0.10             |
| F62A   | 5.28 ± 0.08**     | 105.64 ± 4.54                    | 58.47 ± 6.68                            | -4.41 ± 0.14***          |
| V65A   | 5.33 ± 0.09*      | 106.08 ± 4.91                    | 49.35 ± 1.32                            | -4.08 ± 0.12             |
| K66A   | 5.60 ± 0.08       | 106.82 ± 4.09                    | 13.88 ± 2.07                            | -4.02 ± 0.11             |
| Y69A   | 5.44 ± 0.09*      | 104.75 ± 4.29                    | 36.69 ± 1.41                            | -3.81 ± 0.10             |
| K118A  | 4.61 ± 0.12***    | 92.40 ± 7.25                     | 57.63 ± 4.09                            | -4.51 ± 0.13***          |
| S145A  | 6.34 ± 0.09       | 101.87 ± 3.50                    | 37.13 ± 2.32                            | -4.22 ± 0.14**           |
| H146A  | 5.07 ± 0.08***    | 101.06 ± 4.83                    | 57.74 ± 7.57                            | -4.64 ± 0.11***          |
| I225A  | 4.98 ± 0.12***    | 76.03 ± 5.48***                  | 23.03 ± 2.05                            | -3.85 ± 0.13             |
| L290A  | 5.58 ± 0.08       | 109.60 ± 3.90                    | 34.40 ± 7.20                            | -4.56 ± 0.09***          |
| L294A  | 5.32 ± 0.10*      | 106.26 ± 5.25                    | 35.47 ± 1.85                            | -4.96 ± 0.12***          |

cAMP accumulation data were analyzed using a three-parameter logistic equation to determine pEC<sub>50</sub> and E<sub>max</sub> values. pEC<sub>50</sub> is the negative logarithm of the molar concentration of agonist that induced half the maximal response. E<sub>max</sub> for mutants is expressed as a percentage of the WT GHRHR. Data were analyzed by nonlinear regression using the operational model equation to determine the logR values (logτ/K<sub>A</sub>, *i.e.*, logarithm of the transduction ratio). τ is the efficacy value of the agonist and was corrected by cell surface expression of the receptor. K<sub>A</sub> is dissociation constant. Changes in transduction ratio (ΔlogR) were calculated to determine the relative effectiveness of the mutants. All values are means ± S.E.M. of four independent experiments (*n* = 4) conducted in quadruplicate. Statistical analysis was carried out by comparing the control responses in the WT-SV1. \*, *P* < 0.05, \*\*, *P* < 0.01 and \*\*\*, *P* < 0.001, determined by one-way ANOVA.
